# Supplementary material
Source: PubMed Central journal article supplement (PMC4018242)

Type of file: figure

Label: Supplemental Figure

Filename: Figure S1\_semenova.tif

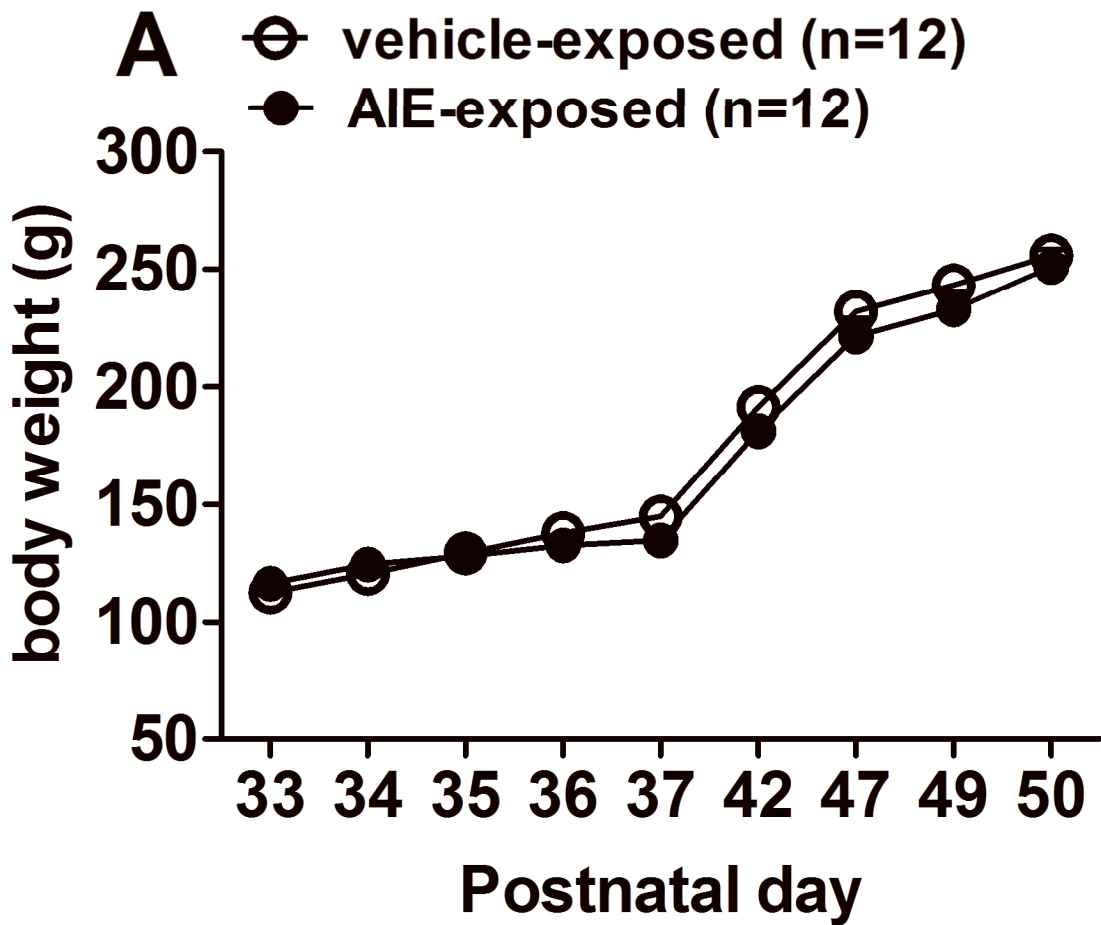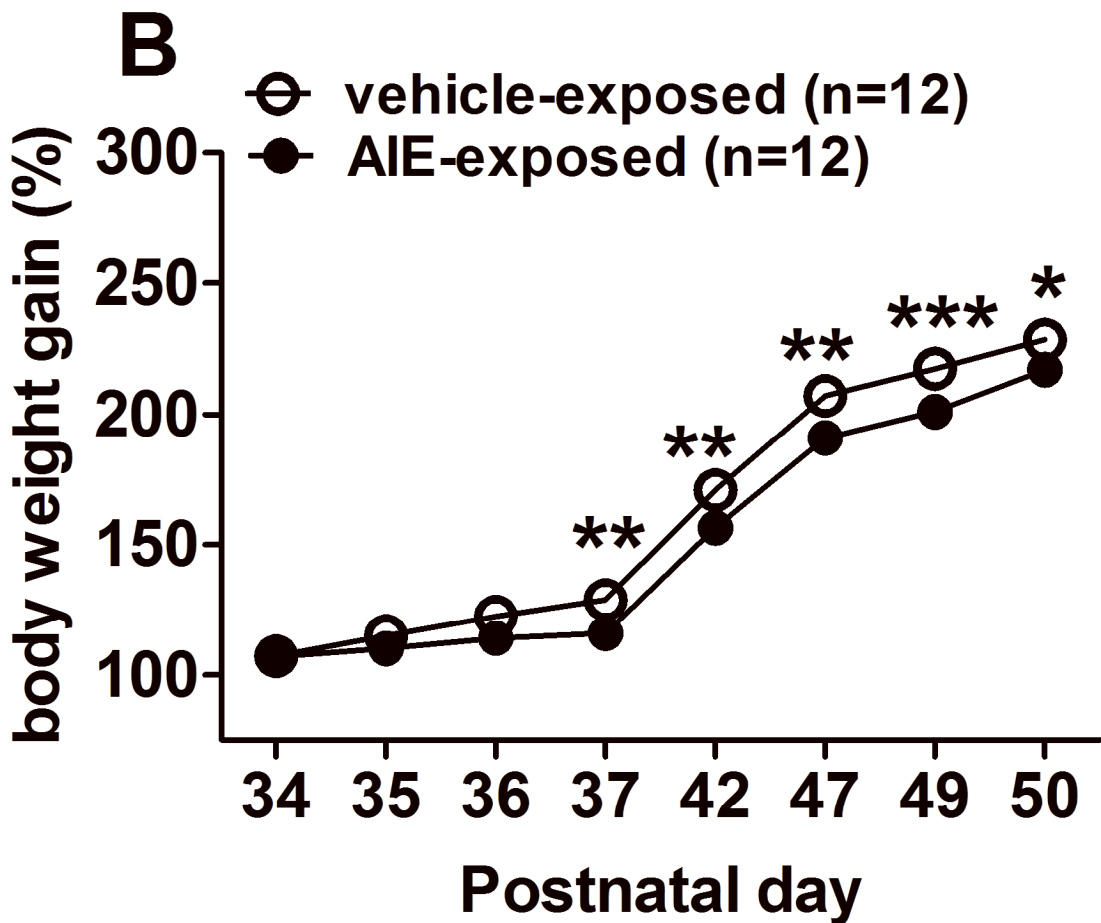

Supplement: NIHMS579842-supplement-01.pdf [file NIHMS579842-supplement-01.pdf]
